# Supplementary material
Source: HighWire-hosted journal article supplement (https://bmjopen.bmj.com/content/14/4/e078464)
Supplement: inline-supplementary-material-2 [file inline-supplementary-material-2.pdf]

Full search strategies for all databases

| DATABASE       | SEARCH TERM                                                                                                                                                                                                                                                                                                                                                                                                                                                                                                                             |
|----------------|-----------------------------------------------------------------------------------------------------------------------------------------------------------------------------------------------------------------------------------------------------------------------------------------------------------------------------------------------------------------------------------------------------------------------------------------------------------------------------------------------------------------------------------------|
| SCOPUS         | TITLE-ABS((((footprint OR "carbon emission" OR "greenhouse gas*")) AND (("health care" OR "healthcare" OR "health-care" OR "health sector" OR "health system" OR "health services")))) OR ("input-output" AND (("health care" OR "healthcare" OR "health-care" OR "health sector" OR "health system" OR "health services")) AND ((footprint OR "carbon emission" OR "greenhouse gas*" OR environmental* extended)))) AND NOT DOCTYPE(ed) AND NOT DOCTYPE(er) AND NOT DOCTYPE(le) AND NOT DOCTYPE(no) AND NOT DOCTYPE(pr)                |
| WEB OF SCIENCE | TOPIC: (((((footprint OR "carbon emission" OR "greenhouse gas*")) AND (("health care" OR "healthcare" OR "health-care" OR "health sector" OR "health system" OR "health services")))) OR ("input-output" AND (("health care" OR "healthcare" OR "health-care" OR "health sector" OR "health system" OR "health services")) AND ((footprint OR "carbon emission" OR "greenhouse gas*" OR environmental* extended))))Timespan: All years. Indexes: SCI-EXPANDED, SSCI, A&HCI, CPCI-S, CPCI-SSH, BKCI-S, BKCI-SSH, ESCI, CCR-EXPANDED, IC. |
| ECONBIZ        | (((footprint OR "carbon emission" OR "greenhouse gas*")) AND (("health care" OR "healthcare" OR "health-care" OR "health sector" OR "health system" OR "health services")))) OR ("input-output" AND (("health care" OR "healthcare" OR "health-care" OR "health sector" OR "health system" OR "health services")) AND ((footprint OR "carbon emission" OR "greenhouse gas*" OR environmental* extended)))                                                                                                                               |
| PUBMED         | Search (((footprint OR "carbon emission" OR "greenhouse gas*")) AND (("health care" OR "healthcare" OR "health-care" OR "health sector" OR "health system" OR "health services")))) OR ("input-output" AND (("health care" OR "healthcare" OR "health-care" OR "health sector" OR "health system" OR "health services")) AND ((footprint OR "carbon emission" OR "greenhouse gas*" OR environmental* extended)))                                                                                                                        |
